# Supplementary material
Source: MDPI journal article supplement (https://www.mdpi.com/2411-5142/8/2/65)
Supplement: s1 [file s1]

## The Effect of Age and The Popularity of Sport on Differences Among Wrestlers in Parental Support

Supplementary files: Figures S1–S4 statistically significant difference in age

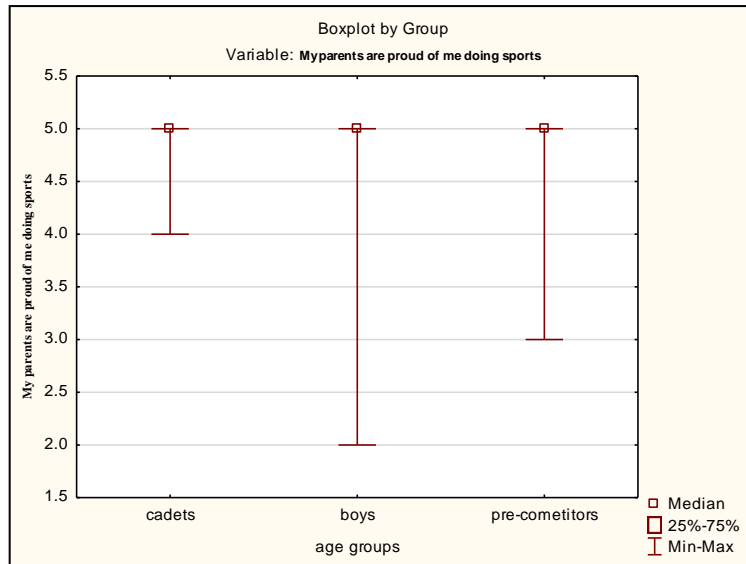

Figure S1 - Item 8 *My parents are proud of me doing sports* [ $p=0.03$ ]

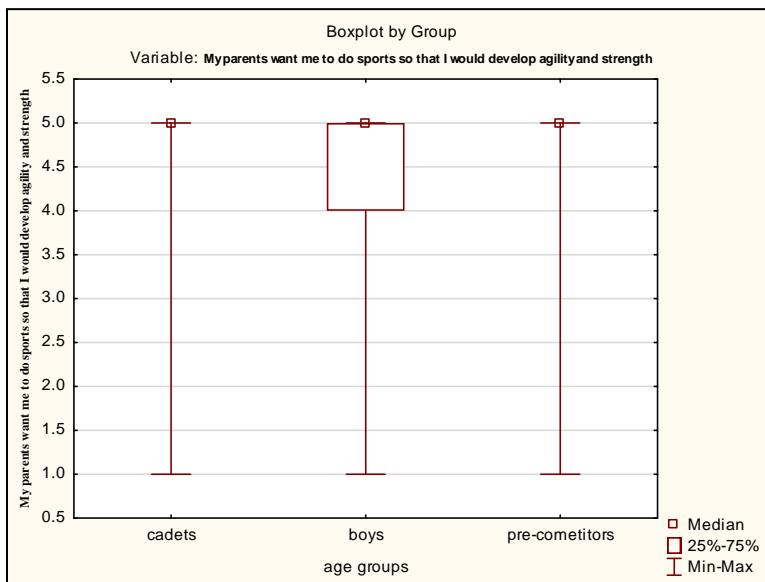

Figure S2 – Item 9 *My parents want me to do sports so that I would develop agility and strength* [ $p=0.04$ ]

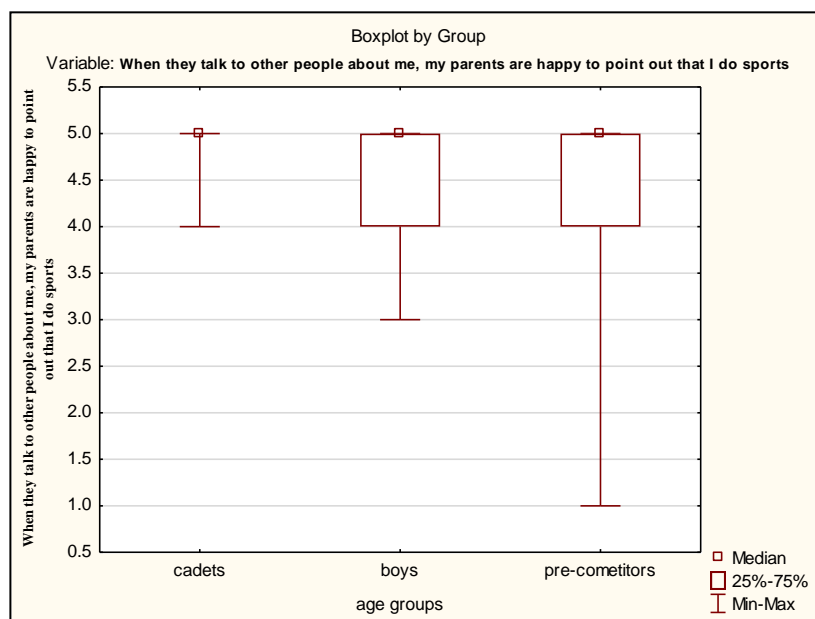

Figure S3 – Item 16 - *When they talk to other people about me, my parents are happy to point out that I do sports* [p=0.03]

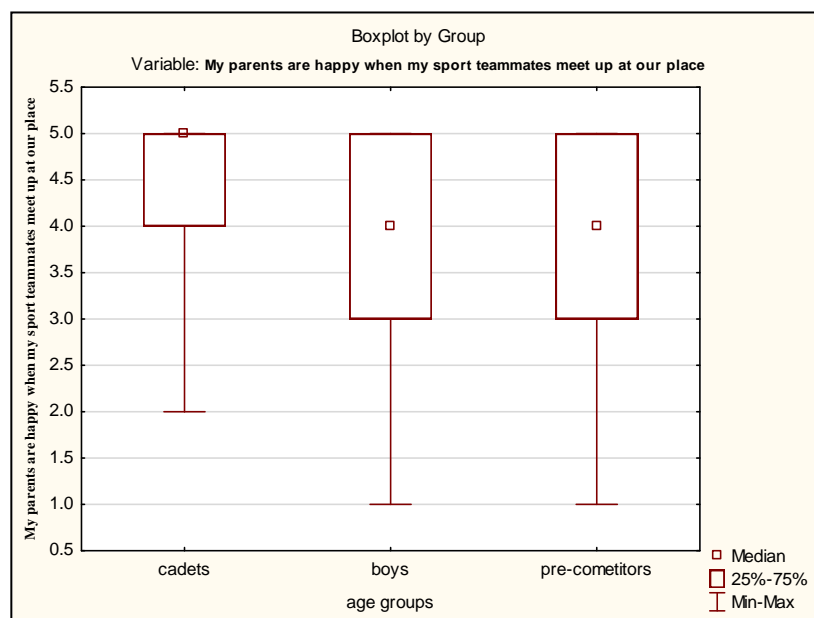

Figure S4 – Item 18 - *My parents are happy when my sport teammates meet up at our place* [p=0.002]

## Supplementary files, Figures S5 and S6 statistically significant difference in popularity

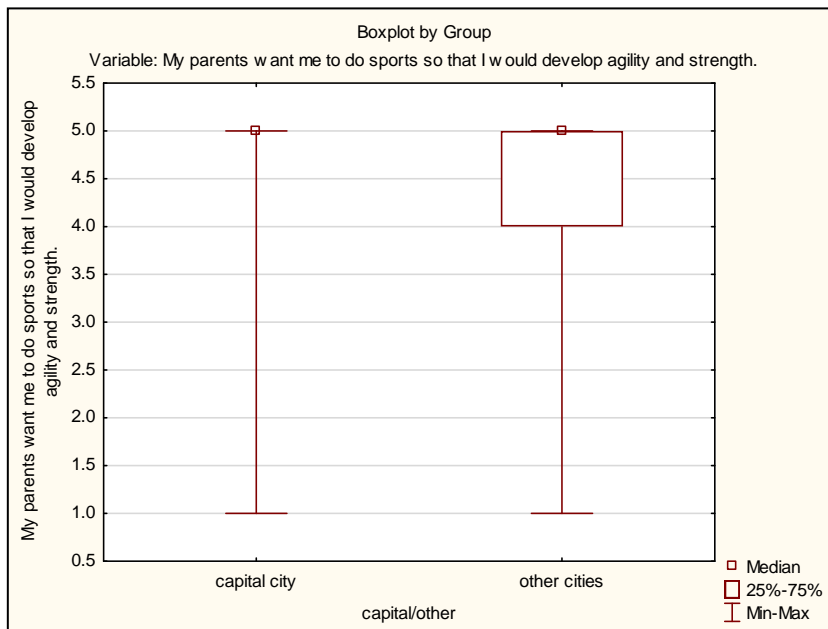

Figure S5 – Item 9 *My parents want me to do sports so that I would develop agility and strength* [p=0.04]

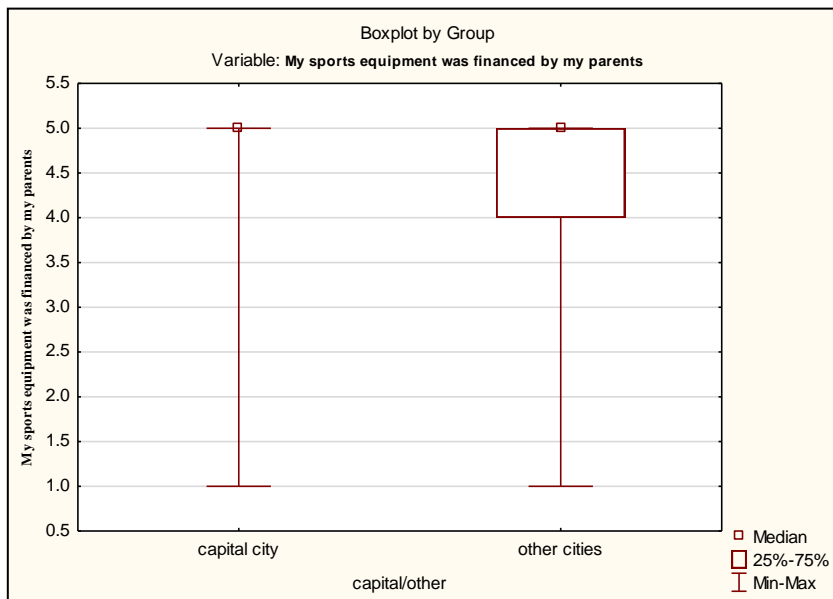

Figure S6 – Item 15 *My sports equipment was financed by my parents* [p=0.03]
